# Supplementary material for: Development and Validation of a Model for Predicting the Risk of Acute Kidney Injury Associated With Contrast Volume Levels During Percutaneous Coronary Intervention
Source: PubMed Central journal article supplement (PMC6902830; doi:10.1001/jamanetworkopen.2019.16021), 2019-11-22
Supplement: jamanetwopen-2-e1916021-s001.pdf [file jamanetwopen-2-e1916021-s001.pdf]

## Supplementary Online Content

Huang C, Li S-X, Mahajan S, et al. Development and validation of a model for predicting the risk of acute kidney injury associated with contrast volume levels during percutaneous coronary intervention. *JAMA Netw Open*. 2019;2(11):e1916021.  
doi:10.1001/jamanetworkopen.2019.16021

**eFigure 1.** Study Flow for Model Development and Internal and Temporal Validations

**eFigure 2.** Model Selection via Visual Comparison Between Scatterplot of Observations and Contour Plots of Predictions by Candidate Models

**eFigure 3.** Calibration Plots of the Model Predicting Risks of Acute Kidney Injury in Deciles in the Test Set

**eFigure 4.** Calibration Plots of the Model in Deciles in the Validation Cohort

**eFigure 5.** Calibration Plots of the Model via Splines in the Validation Cohort

**eFigure 6.** Modeled Risk of Acute Kidney Injury as a Function of Baseline Risk and Contrast Volume

**eTable 1.** Predictors in the Machine Learning Model for Preprocedural Risk Estimation

**eTable 2.** Use Pattern of Contrast Volume

**eTable 3.** Model Performance Comparison Between Multinomial and Ordinal Logit Link Functions

**eTable 4.** Odds Ratio and Absolute Risk Difference of Acute Kidney Injury by 200 mL Increase in Contrast Volume

This supplementary material has been provided by the authors to give readers additional information about their work.

**eFigure 1.** Study Flow for Model Development and Internal and Temporal Validations

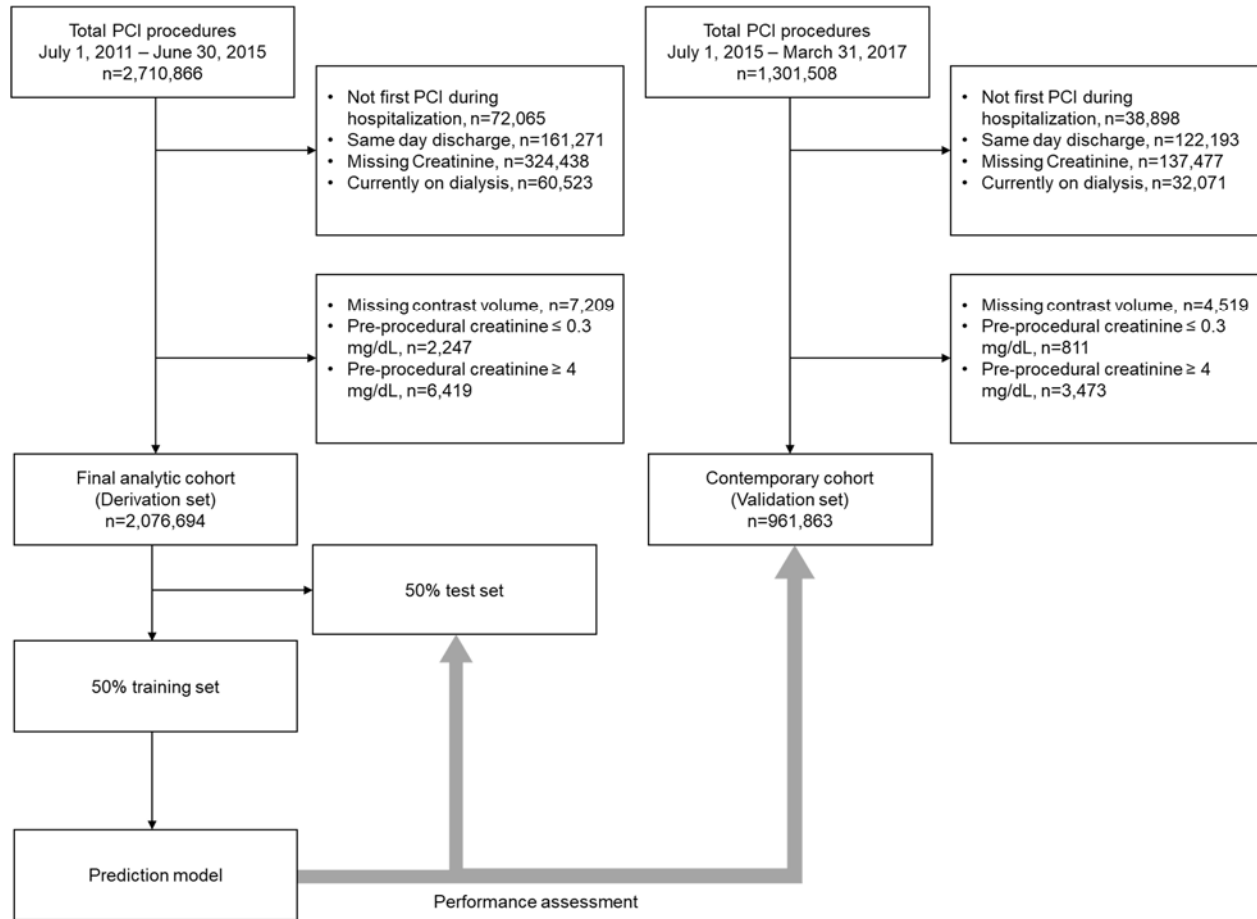

## eFigure 2. Model Selection via Visual Comparison Between Scatterplot of Observations and Contour Plots of Predictions by Candidate Models

Comparison of (A) observed risk of creatinine increase at least 0.3 mg/dL to predictions from (B) model with linear variables, (C) model with linear variables and interaction term, (D) model with nonlinear variables, and (E) model with nonlinear variables and interaction term.

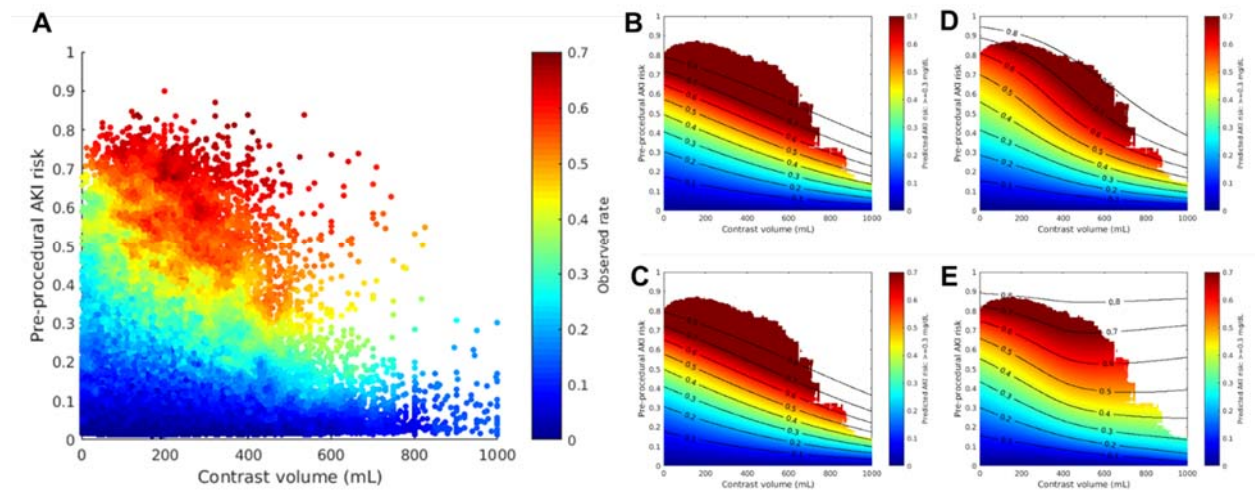

### eFigure 3. Calibration Plots of the Model Predicting Risks of Acute Kidney Injury in Deciles in the Test Set

The calibration plots are produced for observed versus deciles of predicted risks of absolute increase in creatinine of (A) 0.3 mg/dL, (B) 0.5 mg/dL, and (C) 1.0 mg/dL were calculated in the observed versus predicted risks via cubic spline smoothing.

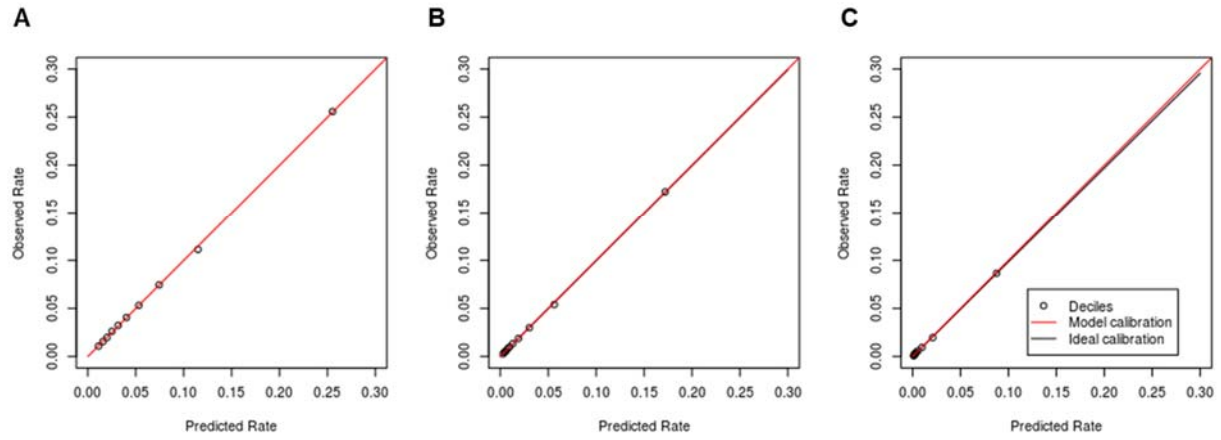

### eFigure 4. Calibration Plots of the Model in Deciles in the Validation Cohort

Risks of absolute increase in creatinine of at least (A) 0.3 mg/dL, (B) 0.5 mg/dL, and (C) 1.0 mg/dL were calculated in the observed versus predicted deciles of risks. The black line and the dotted lines indicate the calibration of the model with 95% confidence interval. The red line indicates ideal calibration.

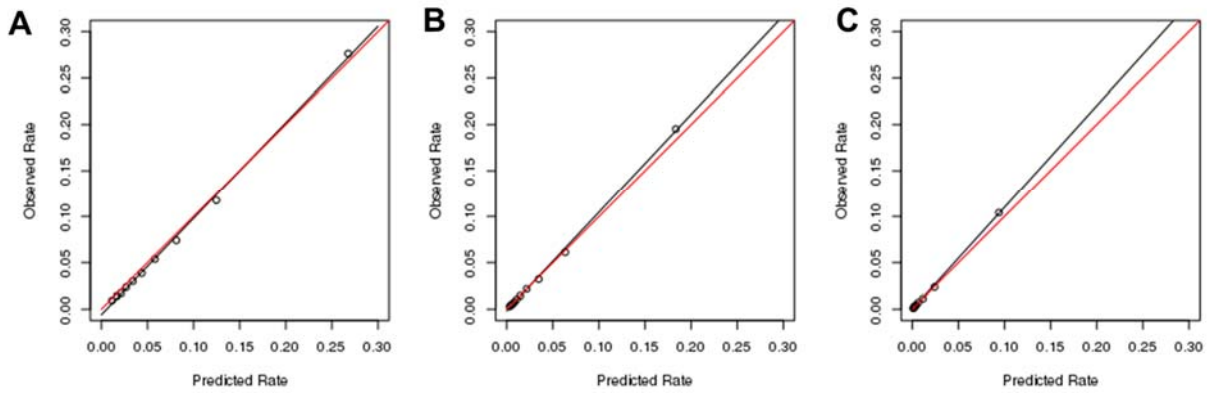

### eFigure 5. Calibration Plots of the Model via Splines in the Validation Cohort

Risks of absolute increase in creatinine of at least (A) 0.3 mg/dL, (B) 0.5 mg/dL, and (C) 1.0 mg/dL were calculated in the observed versus predicted risks via cubic spline smoothing. The black line and the dotted lines indicate the calibration of the model with 95% confidence interval. The red line indicates ideal calibration.

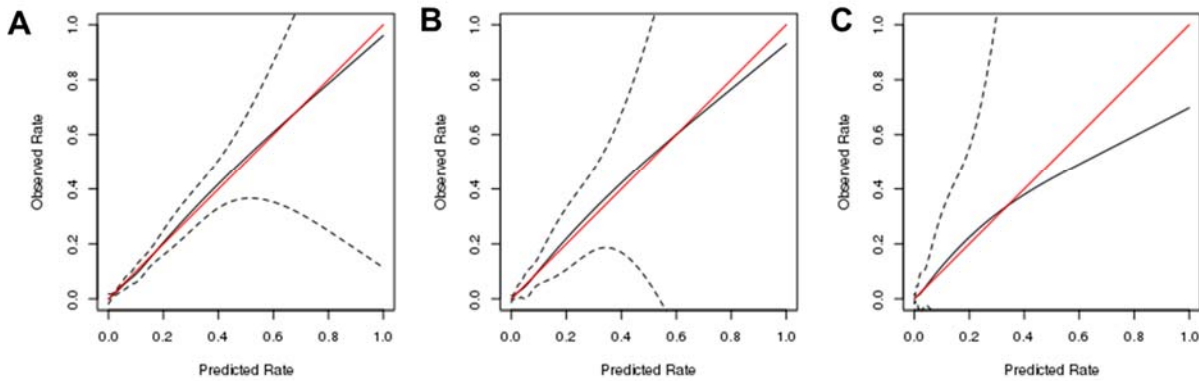

## eFigure 6. Modeled Risk of Acute Kidney Injury as a Function of Baseline Risk and Contrast Volume

Risks of absolute increase in creatinine of at least (A) 0.3 mg/dL, (B) 0.5 mg/dL, and (C) 1.0 mg/dL.

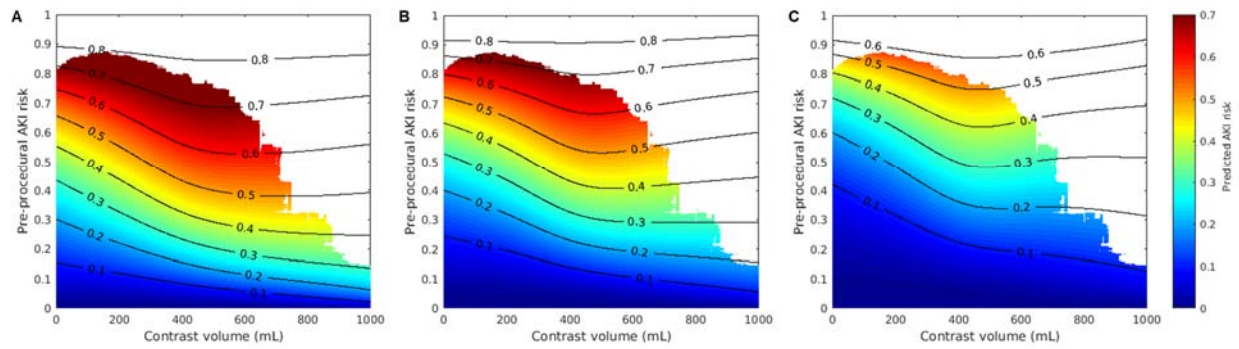

**eTable 1.** Predictors in the Machine Learning Model for Preprocedural Risk Estimation

| <b>Predictors</b>                     | <b>Coding details</b>                            |
|---------------------------------------|--------------------------------------------------|
| Age                                   |                                                  |
| Prior heart failure                   |                                                  |
| Cardiogenic shock w/in 24 hours       | no vs. yes                                       |
| Cardiac arrest w/in 24 hours          | no vs. yes                                       |
| Diabetes mellitus composite           | no vs. yes, insulin vs. yes, other therapies     |
| CAD presentation composite            | non-STEMI/others                                 |
| Heart failure w/in 2 weeks composite  | no vs. yes, NYHA class IV vs. yes, other classes |
| Pre-procedure GFR                     |                                                  |
| Pre-procedure hemoglobin              |                                                  |
| Admission source                      | emergency department vs. other admission sources |
| Body mass index                       |                                                  |
| PCI status                            | elective vs. emergency vs. other statuses        |
| Pre-PCI ventricular ejection fraction |                                                  |

CAD, coronary artery disease; STEMI, ST-elevation myocardial infarction; NYHA, New York Heart Association; GFR, glomerular filtration rate; PCI, percutaneous coronary intervention



**eTable 2.** Use Pattern of Contrast Volume

| Derivation cohort          |                     |               |                |                |                |                |              |              |              |             |                   |
|----------------------------|---------------------|---------------|----------------|----------------|----------------|----------------|--------------|--------------|--------------|-------------|-------------------|
| n (% <sup>a</sup> )        | Contrast volume, mL |               |                |                |                |                |              |              |              |             |                   |
| Pre-procedural AKI risk, % | 0–50                | 50–100        | 100–150        | 150–200        | 200–250        | 250–300        | 300–350      | 350–400      | 400–600      | >600        | All               |
| 0–5                        | 14,432 (1.4)        | 101,441 (9.8) | 253,306 (24.6) | 279,209 (27.1) | 181,538 (17.6) | 102,956 (10.0) | 48,254 (4.7) | 25,541 (2.5) | 22,153 (2.1) | 1,952 (0.2) | 1,030,782 (100.0) |
| 5–10                       | 9,954 (1.7)         | 62,934 (10.7) | 145,266 (24.8) | 155,853 (26.7) | 101,302 (17.3) | 56,824 (9.7)   | 26,510 (4.5) | 13,653 (2.3) | 11,432 (2.0) | 898 (0.2)   | 584,626 (100.0)   |
| 10–25                      | 8,635 (2.4)         | 46,457 (12.9) | 92,486 (25.7)  | 92,395 (25.7)  | 58,040 (16.2)  | 32,236 (9.0)   | 14,903 (4.1) | 7,539 (2.1)  | 6,363 (1.8)  | 500 (0.1)   | 359,554 (100.0)   |
| 25–50                      | 3,540 (4.0)         | 14,821 (16.9) | 23,309 (26.5)  | 20,639 (23.5)  | 12,396 (14.1)  | 6,762 (7.7)    | 3,142 (3.6)  | 1,600 (1.8)  | 1,517 (1.7)  | 119 (0.1)   | 87,845 (100.0)    |
| 50–75                      | 652 (4.8)           | 2,320 (17.0)  | 3,392 (24.9)   | 3,023 (22.2)   | 1,914 (14.1)   | 1,132 (8.3)    | 557 (4.1)    | 295 (2.2)    | 296 (2.2)    | 30 (0.2)    | 13,611 (100.0)    |
| >75                        | 14 (5.1)            | 41 (14.9)     | 64 (23.2)      | 71 (25.7)      | 43 (15.6)      | 21 (7.6)       | 7 (2.5)      | 6 (2.2)      | 6 (2.2)      | 3 (1.1)     | 276 (100.0)       |
| Validation cohort          |                     |               |                |                |                |                |              |              |              |             |                   |
| n (% <sup>a</sup> )        | Contrast volume, mL |               |                |                |                |                |              |              |              |             |                   |
| Pre-procedural AKI risk, % | 0–50                | 50–100        | 100–150        | 150–200        | 200–250        | 250–300        | 300–350      | 350–400      | 400–600      | >600        | All               |
| 0–5                        | 5,093 (1.2)         | 49,617 (11.3) | 119,642 (27.2) | 118,624 (27.0) | 72,607 (16.5)  | 39,395 (9.0)   | 17,639 (4.0) | 9,098 (2.1)  | 7,340 (1.7)  | 640 (0.1)   | 439,695 (100.0)   |
| 5–10                       | 4,280 (1.5)         | 34,648 (12.3) | 77,490 (27.5)  | 74,919 (26.6)  | 45,471 (16.2)  | 24,240 (8.6)   | 10,794 (3.8) | 5,417 (1.9)  | 4,60 (1.5)   | 318 (0.1)   | 281,937 (100.0)   |
| 10–25                      | 4,409 (2.4)         | 27,786 (15.0) | 52,272 (28.2)  | 47,269 (25.5)  | 27,485 (14.8)  | 14,297 (7.7)   | 6,342 (3.4)  | 3,056 (1.6)  | 2,524 (1.4)  | 201 (0.1)   | 185,641 (100.0)   |
| 25–50                      | 2,111 (4.5)         | 8,986 (19.1)  | 13,292 (28.3)  | 10,775 (22.9)  | 6,040 (12.8)   | 3,130 (6.7)    | 1,386 (2.9)  | 723 (1.5)    | 565 (1.2)    | 32 (0.1)    | 47,040 (100.0)    |
| 50–75                      | 474 (6.4)           | 1,438 (19.5)  | 1,906 (25.9)   | 1,535 (20.8)   | 957 (13.0)     | 537 (7.2)      | 251 (3.4)    | 140 (1.9)    | 111 (1.5)    | 29 (0.3)    | 7,530 (100.0)     |
| >75                        | 11 (6.8)            | 24 (14.8)     | 39 (24.1)      | 41 (25.3)      | 18 (11.1)      | 8 (4.9)        | 10 (6.2)     | 5 (3.1)      | 6 (3.7)      | 0 (0.0)     | 162 (100.0)       |

<sup>a</sup>Percentage is calculated row-wise.

**eTable 3. Model Performance Comparison<sup>a</sup> Between Multinomial and Ordinal Logit Link Functions**

|                               | <b>≥0.3 mg/dL</b>      | <b>≥0.5 mg/dL</b>      | <b>≥1.0 mg/dL</b>      |
|-------------------------------|------------------------|------------------------|------------------------|
| Event rate                    | 6.4%                   | 3.2%                   | 1.4%                   |
| <b>Multinomial logit link</b> |                        |                        |                        |
| AUC                           | 0.778 (0.776,0.780)    | 0.839 (0.837,0.841)    | 0.870 (0.867,0.873)    |
| Calibration slope             | 1.002 (0.993,1.011)    | 1.005 (0.995,1.015)    | 1.006 (0.994,1.020)    |
| Calibration intercept         | -0.000 (-0.001,0.000)  | -0.000 (-0.001,0.000)  | -0.000 (-0.000,0.000)  |
| Brier score                   | 0.0541 (0.0540,0.0542) | 0.0278 (0.0278,0.0279) | 0.0125 (0.0125,0.0126) |
| Predictive range              | 24.6% (24.4%,24.8%)    | 17.1% (17.0%,17.3%)    | 8.8% (8.7%,8.9%)       |
| <b>Ordinal logit link</b>     |                        |                        |                        |
| AUC                           | 0.778 (0.776,0.780)    | 0.839 (0.837,0.841)    | 0.870 (0.867,0.873)    |
| Calibration slope             | 0.949 (0.940,0.958)    | 1.186 (1.175,1.197)    | 1.346 (1.329,1.363)    |
| Calibration intercept         | 0.002 (0.002,0.003)    | -0.007 (-0.007,-0.007) | -0.005 (-0.005,-0.005) |
| Brier score                   | 0.0541 (0.0540,0.0543) | 0.0279 (0.0279,0.0280) | 0.0126 (0.126,0.126)   |
| Predictive range              | 24.6% (24.4%,24.9%)    | 17.1% (16.9%,17.3%)    | 8.8% (8.7%,8.9%)       |

<sup>a</sup>Performance was evaluated on training set for prediction risks of absolute increase in creatinine of at least 0.3 mg/dL, 0.5 mg/dL, and 1.0 mg/dL.

AUC, area under the receiver operating characteristic curve

**eTable 4.** Odds Ratio and Absolute Risk Difference of Acute Kidney Injury<sup>a</sup> by 200 mL Increase in Contrast Volume

| <b>≥0.3 mg/dL</b>              | <b>100–300 mL</b> |                 | <b>400–600 mL</b> |               | <b>700–900 mL</b> |               |
|--------------------------------|-------------------|-----------------|-------------------|---------------|-------------------|---------------|
| <b>Pre-procedural AKI risk</b> | <b>OR</b>         | <b>RD, %</b>    | <b>OR</b>         | <b>RD, %</b>  | <b>OR</b>         | <b>RD, %</b>  |
| 5%                             | 1.36 (1.32–1.42)  | 1.1 (1.0–1.2)   | 1.64 (1.52–1.77)  | 3.1 (2.5–3.7) | 1.51 (1.30–1.76)  | 4.5 (2.4–6.6) |
| 45%                            | 1.56 (1.49–1.64)  | 10.7 (9.6–11.9) | 1.15 (0.98–1.34)  | 3.4 (0–7.3)   | - <sup>b</sup>    | -             |
| 80%                            | 1.30 (1.10–1.54)  | 5.2 (1.9–8.6)   | -                 | -             | -                 | -             |
| <b>≥0.5 mg/dL</b>              | <b>100–300 mL</b> |                 | <b>400–600 mL</b> |               | <b>700–900 mL</b> |               |
| <b>Pre-procedural AKI risk</b> | <b>OR</b>         | <b>RD, %</b>    | <b>OR</b>         | <b>RD, %</b>  | <b>OR</b>         | <b>RD, %</b>  |
| 5%                             | 1.41 (1.33–1.49)  | 0.4 (0.3–0.4)   | 1.97 (1.75–2.21)  | 1.7 (1.3–2.2) | 1.63 (1.30–2.04)  | 2.8 (1.0–4.6) |
| 45%                            | 1.56 (1.48–1.65)  | 9.7 (8.5–10.8)  | 1.1 (0.89–1.28)   | 1.6 (0–6.1)   | -                 | -             |
| 80%                            | 1.26 (1.06–1.50)  | 5.3 (1.3–9.2)   | -                 | -             | -                 | -             |
| <b>≥1.0 mg/dL</b>              | <b>100–300 mL</b> |                 | <b>400–600 mL</b> |               | <b>700–900 mL</b> |               |
| <b>Pre-procedural AKI risk</b> | <b>OR</b>         | <b>RD, %</b>    | <b>OR</b>         | <b>RD, %</b>  | <b>OR</b>         | <b>RD, %</b>  |
| 5%                             | 1.51 (1.36–1.67)  | 0.1 (0.1–0.2)   | 2.27 (1.91–2.70)  | 0.7 (0.5–1.0) | 1.88 (1.36–2.61)  | 1.6 (0.3–3.0) |
| 45%                            | 1.75 (1.64–1.87)  | 8.3 (7.3–9.3)   | 1.03 (0.82–1.30)  | 0.6 (0–5.1)   | -                 | -             |
| 80%                            | 1.38 (1.12–1.69)  | 8.0 (2.8–13.1)  | -                 | -             | -                 | -             |

AKI, acute kidney injury; OR, odds ratio; RD, absolute risk difference.

<sup>a</sup>Risk of absolute increase in creatinine of at least 0.3 mg/dL, 0.5 mg/dL, and 1.0 mg/dL.

<sup>b</sup>OR and RD were not calculated if there were <10 patients in the neighborhood of the values of pre-procedural AKI risk and contrast volume.
